# Supplementary material for: Macroporous 3D Chitosan Cryogels for Fastac 10EC Pesticide Adsorption and Antibacterial Applications
Source: Polymers (Basel). 2022 Aug 2;14(15):3145. doi: 10.3390/polym14153145 (PMC9370839; doi:10.3390/polym14153145)
Supplement: Supplementary file 1 [file polymers-14-03145-s001.zip › polymers-1825859-supplementary.pdf]

# Macroporous 3D chitosan cryogels for Fastac 10 EC pesticide adsorption and antibacterial applications

Ionel Adrian Dinu,<sup>1\*</sup> Luminita Ghimici,<sup>1</sup> Irina Elena Raschip<sup>1</sup>

<sup>1</sup>“Petru Poni” Institute of Macromolecular Chemistry, Grigore Ghica Voda Alley 41A, Iasi 700487, Romania

\*Corresponding author: Dr. Ionel Adrian Dinu, *E-mail address*: adinu@icmpp.ro

**Table S1.** Equations used for evaluation of CSGA cryogel features.

| Eq. no. | Equation                                         | Description                                                                                                                                                                                                                                          | Refs. <sup>a</sup> |
|---------|--------------------------------------------------|------------------------------------------------------------------------------------------------------------------------------------------------------------------------------------------------------------------------------------------------------|--------------------|
| (S1)    | $GFY(\%) = \frac{W_d}{W_m} \times 100$           | $W_d$ –amount of cryogel after freeze-drying, g; $W_m$ –total amount of compounds used for preparation of cryogels, g.                                                                                                                               | [12]               |
| (S2)    | $P(\%) = \frac{V_1 - V_3}{V_2 - V_3} \times 100$ | $V_1$ –initial volume of isopropanol, L; $V_2$ – total volume of isopropanol containing the immersed cryogels, L; $V_3$ – volume of isopropanol after the cryogel removal, L.                                                                        | [31]               |
| (S3)    | $WU(g/g) = \frac{W_t - W_d}{W_d}$                | $W_t$ – weight of cryogel in swollen state at time $t$ , g; $W_d$ – weight of cryogel in dried state, g.                                                                                                                                             | [13]               |
| (S4)    | $RE(\%) = \frac{C_i - C_f}{C_i} \times 100$      | $RE$ – removal efficiency, %; $C_i$ – initial pesticide concentration, mg L <sup>-1</sup> ; $C_f$ – pesticide concentration after the interaction with cryogels, mg L <sup>-1</sup> .                                                                | [35]               |
| (S5)    | $q_e = \frac{(C_i - C_e) \times V}{m}$           | $q_e$ – amount of Fastac 10EC adsorbed at equilibrium, mg g <sup>-1</sup> ; $C_i$ – the same meaning as in Eq. (4); $C_e$ – pesticide concentration at equilibrium, mg L <sup>-1</sup> ; $V$ – volume of aqueous emulsion, L; $m$ – sorbent dose, g. | [12]               |

<sup>a</sup>References numbers from the main text.

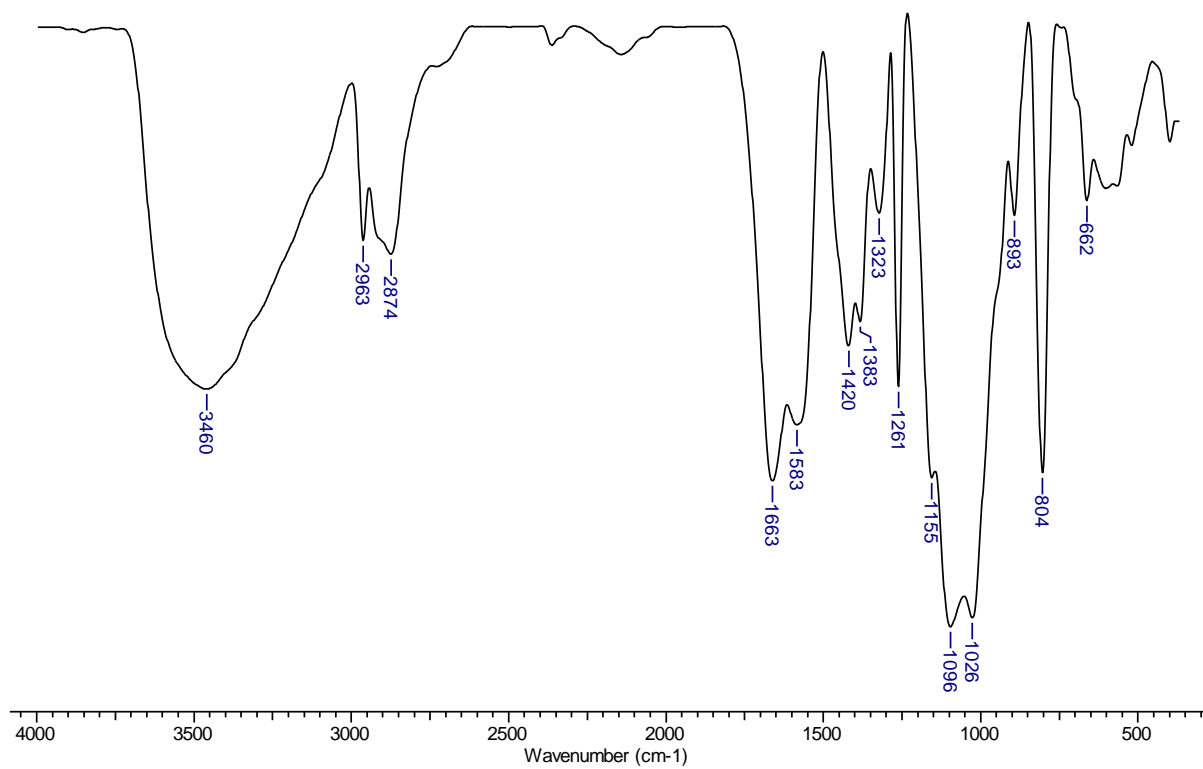

**Figure S1.** FTIR spectrum of CS powder.

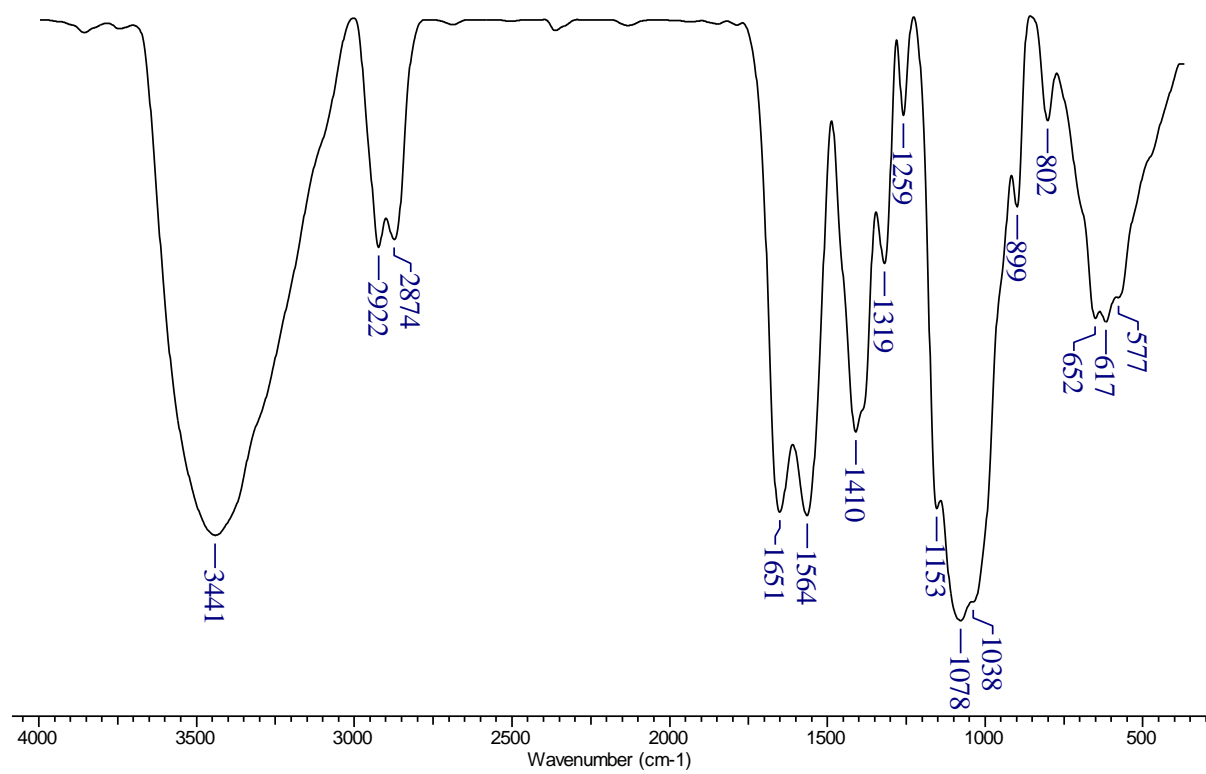

**Figure S2.** FTIR spectrum of CSGA5 cryogel.

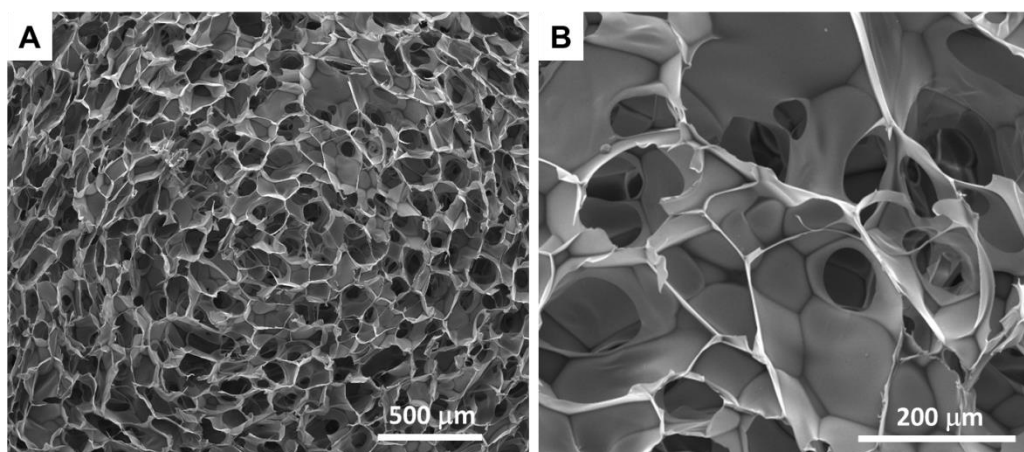

**Figure S3.** SEM micrographs of CSGA cryogels at magnifications of 25x (A) and 100x (B), prepared in the absence of PMMA particles.

## Experimental sorption – data analysis

### 1. Kinetic equations

#### 1.1. Pseudo-first order (PFO) model:

$$q_t = q_e(1 - \exp^{-k_1 t}) \quad (S6)$$

where  $q_e$  and  $q_t$  – amount of pesticide adsorbed at equilibrium and at time  $t$ , min, respectively;  $k_1$  – rate constant of the PFO kinetic model,  $\text{min}^{-1}$ .

#### 1.2. Pseudo-second order (PSO) model:

$$q_t = \frac{q_e^2 k_2 t}{1 + q_e k_2 t} \quad (S7)$$

where  $q_e$  and  $q_t$  have the same meaning as in Eq. 6;  $k_2$  – rate constant of the PSO kinetic model,  $\text{g mg}^{-1} \text{min}^{-1}$ .

#### 1.3. Intraparticle diffusion (IPD) model:

$$q_t = k_{id} t^{0.5} + C \quad (S8)$$

where  $q_t$  has the same meaning as in Eq. 6;  $k_{id}$  – intraparticle diffusion rate constant,  $\text{mg g}^{-1} \text{min}^{-1/2}$ ;  $C$  – constant describing the effect of boundary layer thickness,  $\text{mg g}^{-1}$

### 2. Isotherm equations

#### 2.1. Langmuir model:

$$q_e = \frac{q_m K_L C_e}{1 + K_L C_e} \quad (S9)$$

where  $q_e$  has the same meaning as in Eq. 6;  $q_m$  – maximum theoretical sorption capacity,  $\text{mg g}^{-1}$ ;  $K_L$  – Langmuir constant,  $\text{L mg}^{-1}$ ;  $C_e$  – concentration of the Fastac 10EC in aqueous emulsion at equilibrium,  $\text{mg L}^{-1}$ .

#### 2.2. Freundlich model:

$$q_e = K_F C_e^N \quad (S10)$$

where  $q_e$  has the same meaning as in Eq. 6;  $K_F$  – Freundlich constant,  $\text{mg g}^{-1} \text{mg}^{-N} \text{L}^{-N}$ ;  $C_e$  has the same meaning as in Eq. 9;  $N$  – measure of both the nature and strength of adsorption process, and of active

sites distribution, related to the surface heterogeneity; the larger is its value, the more heterogeneous the sorbent system is.

2.3. Sips model:

$$q_e = \frac{q_m a_s C_e^N}{1 + a_s C_e^N} \quad (S11)$$

where  $q_e$ ,  $q_m$ ,  $C_e$  have the same meaning as in Eqs. 6 and 9;  $a_s$  – Sips constant.

2.4. Temkin model:

$$q_e = \frac{RT}{b_T} \ln(a_T C_e) \text{ and } E_T = \frac{RT}{b_T} \quad (S12)$$

where  $q_e$ ,  $C_e$  have the same meaning as in Eqs. 6 and 9;  $b_T$  is the Temkin constant,  $a_T$  (L g<sup>-1</sup>) is the equilibrium binding constant, while  $E_T$  (kJ mol<sup>-1</sup>) is related to the heat of adsorption;  $R$  – gas constant, J mol<sup>-1</sup> K<sup>-1</sup>;  $T$  – temperature, K.

2.5. Dubinin–Radushkevich (D–R) model:

$$q_e = q_{DR} e^{-K_{DR} \varepsilon^2} \quad (S13)$$

where  $q_e$  has the same meaning as in Eq. 6;  $q_{DR}$  – maximum sorption capacity of the pesticide, mg g<sup>-1</sup>;

$K_{DR}$  – D–R isotherm constant, mol<sup>2</sup> kJ<sup>-2</sup>; Polanyi potential:

$$\varepsilon = RT \ln \left( 1 + \frac{1}{C_e} \right) \quad (S14)$$

$C_e$ ,  $R$ ,  $T$  have the same meaning as in Eqs. 9 and 12, respectively.
